# Supplementary material for: Preparation and characterization of TiO2and γ-Al2O3composite membranes for the separation of oil-in-water emulsions
Source: Royal Society of Chemistry journal article supplement (doi:10.1039/c5ra23523e), 2015-12-28
Supplement: c5ra23523e1.pdf [file c5ra23523e1.pdf]

Supplementary data

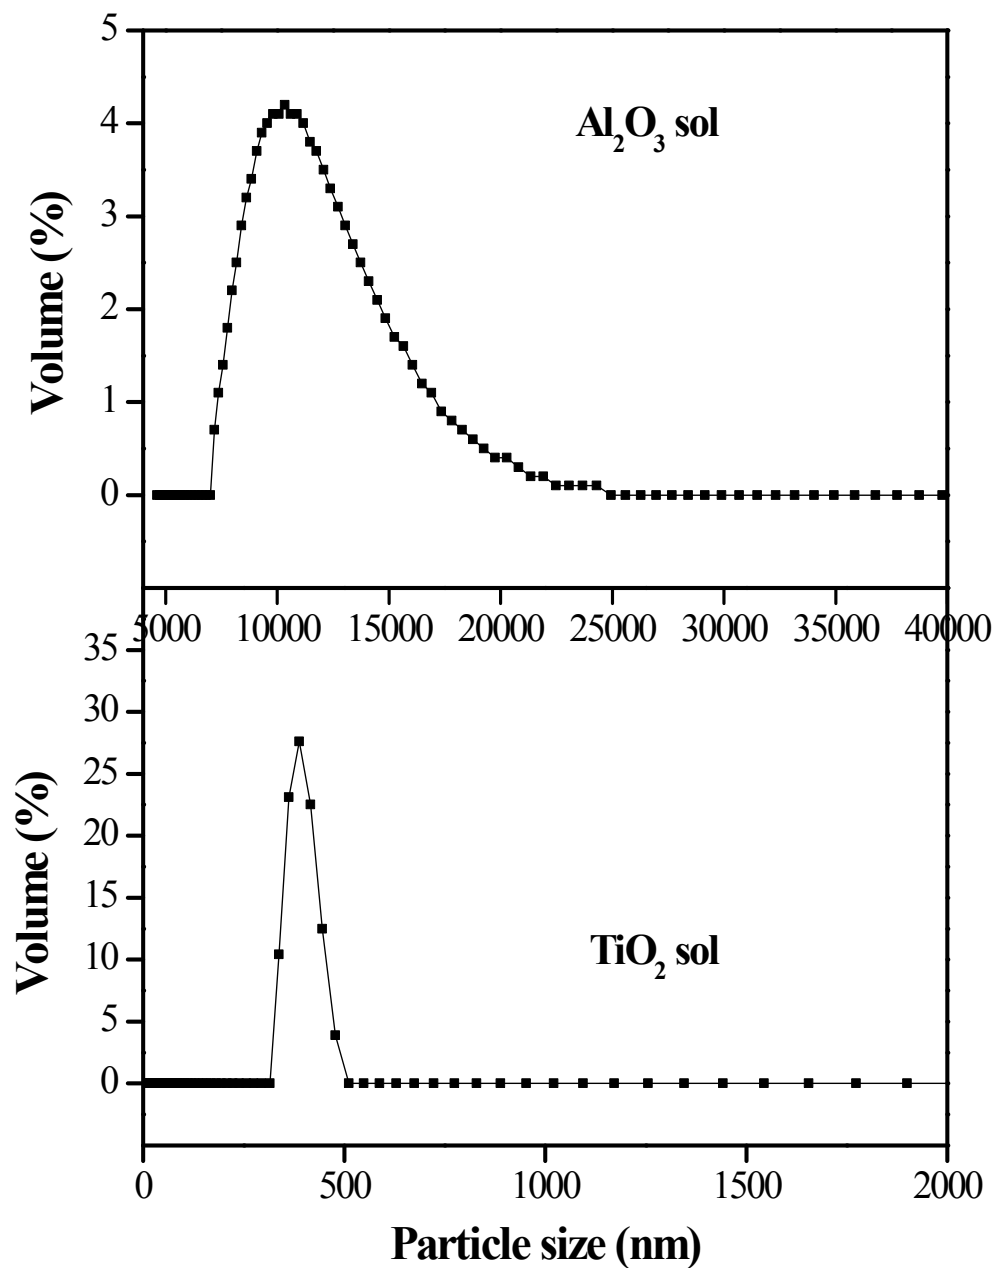

Fig. S1 Particle size distribution of synthesized sols ( $\text{TiO}_2$  and  $\text{Al}_2\text{O}_3$ )

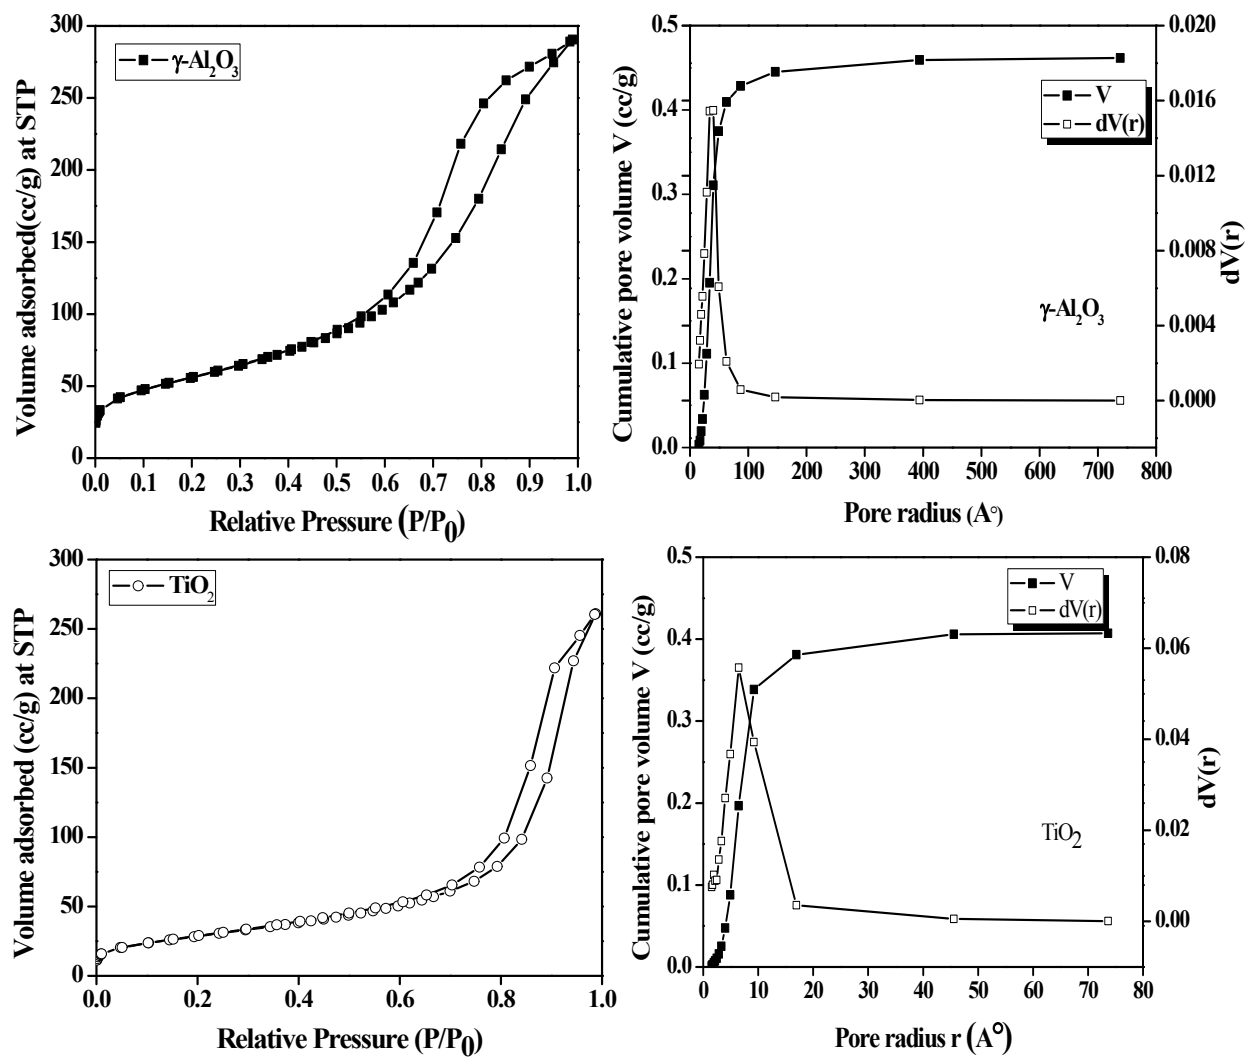

**Fig. S2**  $\text{N}_2$  adsorption and desorption isotherms and BJH pore size distributions of  $\text{TiO}_2$  and  $\gamma\text{-Al}_2\text{O}_3$  powders

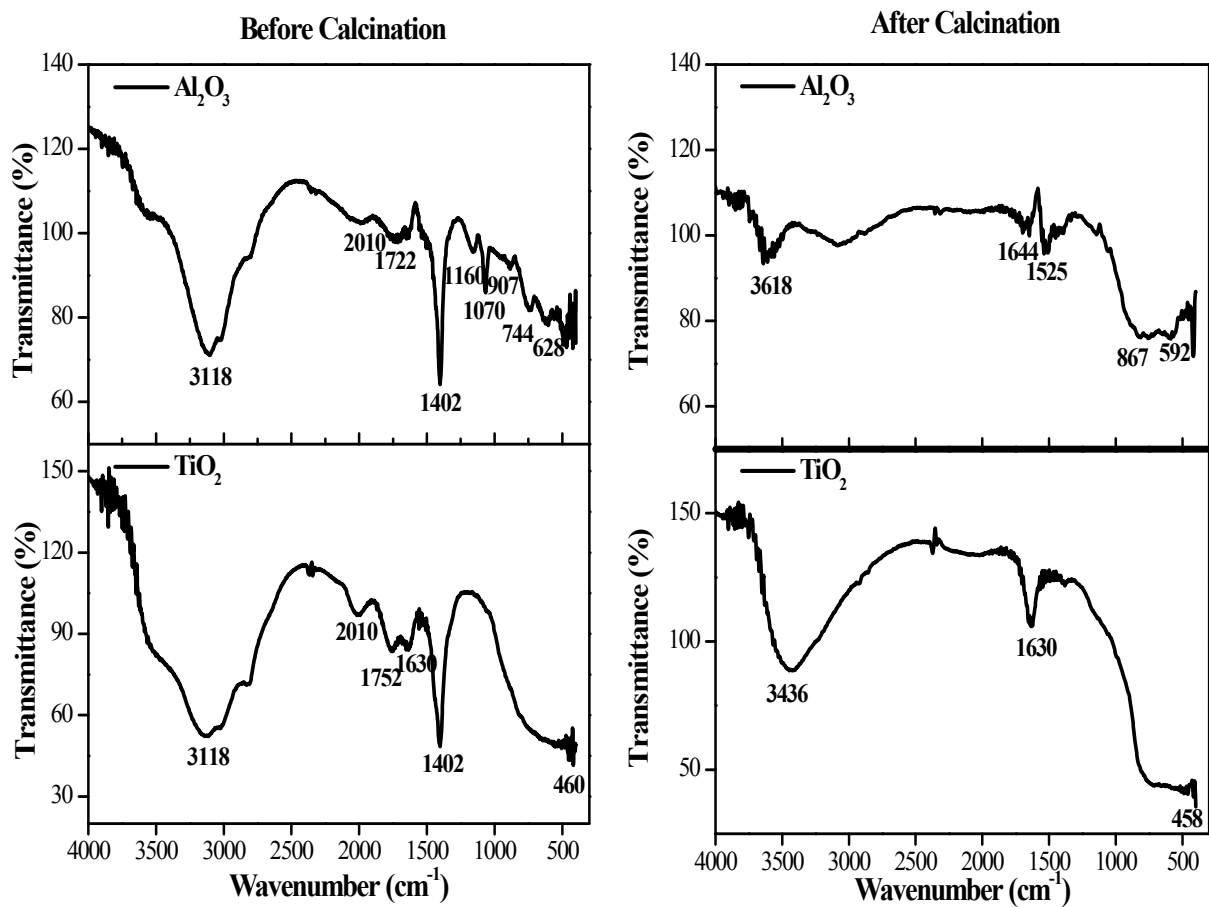

Fig. S3 FTIR analysis of  $\text{TiO}_2$  powder and  $\gamma\text{-Al}_2\text{O}_3$  powder
